# Supplementary material
Source: MDPI journal article supplement (https://www.mdpi.com/2304-6740/4/2/15)

# checkCIF/PLATON report

You have not supplied any structure factors. As a result the full set of tests cannot be run.

THIS REPORT IS FOR GUIDANCE ONLY. IF USED AS PART OF A REVIEW PROCEDURE FOR PUBLICATION, IT SHOULD NOT REPLACE THE EXPERTISE OF AN EXPERIENCED CRYSTALLOGRAPHIC REFEREE.

No syntax errors found.      CIF dictionary      Interpreting this report

## Datablock: em1-6-3c

---

Bond precision:    Si- O = 0.0126 A                      Wavelength=0.71073

Cell:                      a=12.560(2)                      b=19.013(3)                      c=20.359(4)  
                                    alpha=92.925(3)                      beta=98.002(3)                      gamma=93.086(3)  
Temperature:    100 K

|                | Calculated                         | Reported              |
|----------------|------------------------------------|-----------------------|
| Volume         | 4799.1(14)                         | 4799.1(15)            |
| Space group    | P -1                               | P -1                  |
| Hall group     | -P 1                               | ?                     |
| Moiety formula | 2(Fe4 O72 Si2 W18), 55(O),<br>8(K) | ?                     |
| Sum formula    | Fe8 K8 O199 Si4 W36                | Fe4 K4 O99.50 Si2 W18 |
| Mr             | 10674.20                           | 5337.28               |
| Dx,g cm-3      | 3.693                              | 3.694                 |
| Z              | 1                                  | 2                     |
| Mu (mm-1)      | 22.371                             | 22.371                |
| F000           | 4672.0                             | 4672.0                |
| F000'          | 4653.44                            |                       |
| h,k,lmax       | 16,24,26                           | 16,24,26              |
| Nref           | 22044                              | 20941                 |
| Tmin,Tmax      | 0.134,0.209                        | 0.192,0.303           |
| Tmin'          | 0.074                              |                       |

Correction method= # Reported T Limits: Tmin=0.192 Tmax=0.303  
AbsCorr = EMPIRICAL

Data completeness= 0.950                      Theta(max)= 27.500

R(reflections)= 0.0605( 16625)                      wR2(reflections)= 0.1642( 20941)

S = 1.032                      Npar= 1010

---

The following ALERTS were generated. Each ALERT has the format

**test-name\_ALERT\_alert-type\_alert-level.**

Click on the hyperlinks for more details of the test.

---

### Alert level A

SHFSU01\_ALERT\_2\_A The absolute value of parameter shift to su ratio > 0.20

Absolute value of the parameter shift to su ratio given 0.268

Additional refinement cycles may be required.

|                   |                                      |      |        |
|-------------------|--------------------------------------|------|--------|
| PLAT080_ALERT_2_A | Maximum Shift/Error .....            | 0.27 | Why ?  |
| PLAT213_ALERT_2_A | Atom O2 has ADP max/min Ratio .....  | 10.6 | prolat |
| PLAT213_ALERT_2_A | Atom O9 has ADP max/min Ratio .....  | 5.4  | prolat |
| PLAT213_ALERT_2_A | Atom O21 has ADP max/min Ratio ..... | 9.2  | prolat |
| PLAT213_ALERT_2_A | Atom O23 has ADP max/min Ratio ..... | 6.7  | prolat |
| PLAT213_ALERT_2_A | Atom O44 has ADP max/min Ratio ..... | 8.0  | prolat |
| PLAT213_ALERT_2_A | Atom O49 has ADP max/min Ratio ..... | 10.5 | prolat |
| PLAT213_ALERT_2_A | Atom O62 has ADP max/min Ratio ..... | 6.2  | prolat |

---

### Alert level B

DIFMX01\_ALERT\_2\_B The maximum difference density is > 0.1\*ZMAX\*1.00

\_refine\_diff\_density\_max given = 12.713

Test value = 7.400

|                   |                                                     |       |        |
|-------------------|-----------------------------------------------------|-------|--------|
| PLAT029_ALERT_3_B | _diffraction_measured_fraction_theta_full Low ..... | 0.950 | Note   |
| PLAT097_ALERT_2_B | Large Reported Max. (Positive) Residual Density     | 12.71 | eA-3   |
| PLAT213_ALERT_2_B | Atom O37 has ADP max/min Ratio .....                | 4.4   | prolat |
| PLAT250_ALERT_2_B | Large U3/U1 Ratio for Average U(i,j) Tensor ....    | 4.5   | Note   |
| PLAT306_ALERT_2_B | Isolated Oxygen Atom (H-atoms Missing ?) .....      | 073   | Check  |
| PLAT306_ALERT_2_B | Isolated Oxygen Atom (H-atoms Missing ?) .....      | 074   | Check  |
| PLAT306_ALERT_2_B | Isolated Oxygen Atom (H-atoms Missing ?) .....      | 075   | Check  |
| PLAT306_ALERT_2_B | Isolated Oxygen Atom (H-atoms Missing ?) .....      | 076   | Check  |
| PLAT306_ALERT_2_B | Isolated Oxygen Atom (H-atoms Missing ?) .....      | 077   | Check  |
| PLAT306_ALERT_2_B | Isolated Oxygen Atom (H-atoms Missing ?) .....      | 078   | Check  |
| PLAT306_ALERT_2_B | Isolated Oxygen Atom (H-atoms Missing ?) .....      | 079   | Check  |
| PLAT306_ALERT_2_B | Isolated Oxygen Atom (H-atoms Missing ?) .....      | 080   | Check  |
| PLAT306_ALERT_2_B | Isolated Oxygen Atom (H-atoms Missing ?) .....      | 081   | Check  |
| PLAT306_ALERT_2_B | Isolated Oxygen Atom (H-atoms Missing ?) .....      | 082   | Check  |
| PLAT306_ALERT_2_B | Isolated Oxygen Atom (H-atoms Missing ?) .....      | 083   | Check  |
| PLAT306_ALERT_2_B | Isolated Oxygen Atom (H-atoms Missing ?) .....      | 084   | Check  |
| PLAT306_ALERT_2_B | Isolated Oxygen Atom (H-atoms Missing ?) .....      | 085   | Check  |
| PLAT306_ALERT_2_B | Isolated Oxygen Atom (H-atoms Missing ?) .....      | 086   | Check  |
| PLAT306_ALERT_2_B | Isolated Oxygen Atom (H-atoms Missing ?) .....      | 087   | Check  |
| PLAT306_ALERT_2_B | Isolated Oxygen Atom (H-atoms Missing ?) .....      | 088   | Check  |
| PLAT306_ALERT_2_B | Isolated Oxygen Atom (H-atoms Missing ?) .....      | 089   | Check  |
| PLAT306_ALERT_2_B | Isolated Oxygen Atom (H-atoms Missing ?) .....      | 090   | Check  |
| PLAT306_ALERT_2_B | Isolated Oxygen Atom (H-atoms Missing ?) .....      | 091   | Check  |
| PLAT306_ALERT_2_B | Isolated Oxygen Atom (H-atoms Missing ?) .....      | 092   | Check  |
| PLAT306_ALERT_2_B | Isolated Oxygen Atom (H-atoms Missing ?) .....      | 093   | Check  |
| PLAT306_ALERT_2_B | Isolated Oxygen Atom (H-atoms Missing ?) .....      | 094   | Check  |
| PLAT306_ALERT_2_B | Isolated Oxygen Atom (H-atoms Missing ?) .....      | 095   | Check  |
| PLAT306_ALERT_2_B | Isolated Oxygen Atom (H-atoms Missing ?) .....      | 096   | Check  |
| PLAT306_ALERT_2_B | Isolated Oxygen Atom (H-atoms Missing ?) .....      | 097   | Check  |
| PLAT306_ALERT_2_B | Isolated Oxygen Atom (H-atoms Missing ?) .....      | 098   | Check  |
| PLAT306_ALERT_2_B | Isolated Oxygen Atom (H-atoms Missing ?) .....      | 099   | Check  |
| PLAT306_ALERT_2_B | Isolated Oxygen Atom (H-atoms Missing ?) .....      | 0100  | Check  |
| PLAT601_ALERT_2_B | Structure Contains Solvent Accessible VOIDS of .    | 132   | Ang3   |

---

### Alert level C

ABSTY02\_ALERT\_1\_C An \_exptl\_absorpt\_correction\_type has been given without  
a literature citation. This should be contained in the

\_exptl\_absorpt\_process\_details field.  
 Absorption correction given as empirical  
 DIFMX02\_ALERT\_1\_C The maximum difference density is > 0.1\*ZMAX\*0.75  
 The relevant atom site should be identified.

|                   |                                                  |      |        |
|-------------------|--------------------------------------------------|------|--------|
| PLAT094_ALERT_2_C | Ratio of Maximum / Minimum Residual Density .... | 2.51 | Report |
| PLAT202_ALERT_3_C | Isotropic non-H Atoms in Anion/Solvent .....     | 28   | Check  |
| PLAT213_ALERT_2_C | Atom W2 has ADP max/min Ratio .....              | 3.4  | prolat |
| PLAT213_ALERT_2_C | Atom W6 has ADP max/min Ratio .....              | 3.2  | prolat |
| PLAT213_ALERT_2_C | Atom W12 has ADP max/min Ratio .....             | 3.2  | prolat |
| PLAT213_ALERT_2_C | Atom O3 has ADP max/min Ratio .....              | 3.3  | prolat |
| PLAT213_ALERT_2_C | Atom O4 has ADP max/min Ratio .....              | 3.3  | prolat |
| PLAT213_ALERT_2_C | Atom O6 has ADP max/min Ratio .....              | 3.2  | prolat |
| PLAT213_ALERT_2_C | Atom O8 has ADP max/min Ratio .....              | 4.0  | prolat |
| PLAT213_ALERT_2_C | Atom O11 has ADP max/min Ratio .....             | 3.7  | prolat |
| PLAT213_ALERT_2_C | Atom O12 has ADP max/min Ratio .....             | 3.3  | prolat |
| PLAT213_ALERT_2_C | Atom O15 has ADP max/min Ratio .....             | 3.2  | prolat |
| PLAT213_ALERT_2_C | Atom O16 has ADP max/min Ratio .....             | 3.3  | prolat |
| PLAT213_ALERT_2_C | Atom O31 has ADP max/min Ratio .....             | 3.2  | prolat |
| PLAT213_ALERT_2_C | Atom O32 has ADP max/min Ratio .....             | 3.4  | prolat |
| PLAT213_ALERT_2_C | Atom O51 has ADP max/min Ratio .....             | 3.2  | prolat |
| PLAT213_ALERT_2_C | Atom O53 has ADP max/min Ratio .....             | 3.3  | prolat |
| PLAT213_ALERT_2_C | Atom O55 has ADP max/min Ratio .....             | 3.1  | prolat |
| PLAT213_ALERT_2_C | Atom O61 has ADP max/min Ratio .....             | 3.3  | prolat |

### Alert level G

|                   |                                                      |        |             |
|-------------------|------------------------------------------------------|--------|-------------|
| PLAT003_ALERT_2_G | Number of Uiso or Uij Restrained non-H Atoms ...     | 7      | Report      |
| PLAT005_ALERT_5_G | No Embedded Refinement Details found in the CIF      |        | Please Do ! |
| PLAT045_ALERT_1_G | Calculated and Reported Z Differ by a Factor ...     | 0.50   | Check       |
| PLAT083_ALERT_2_G | SHELXL Second Parameter in WGHT Unusually Large      | 214.85 | Why ?       |
| PLAT154_ALERT_1_G | The s.u.'s on the Cell Angles are Equal ..(Note)     | 0.003  | Degree      |
| PLAT304_ALERT_4_G | Non-Integer Number of Atoms ( 0.50) in Resd. #       | 28     | Check       |
| PLAT790_ALERT_4_G | Centre of Gravity not Within Unit Cell: Resd. #<br>O | 24     | Note        |
| PLAT790_ALERT_4_G | Centre of Gravity not Within Unit Cell: Resd. #<br>K | 30     | Note        |
| PLAT860_ALERT_3_G | Number of Least-Squares Restraints .....             | 42     | Note        |
| PLAT899_ALERT_4_G | SHELXL97 is Deprecated and Succeeded by SHELXL       | 2014   | Note        |

9 **ALERT level A** = Most likely a serious problem - resolve or explain  
 34 **ALERT level B** = A potentially serious problem, consider carefully  
 21 **ALERT level C** = Check. Ensure it is not caused by an omission or oversight  
 10 **ALERT level G** = General information/check it is not something unexpected

4 ALERT type 1 CIF construction/syntax error, inconsistent or missing data  
 62 ALERT type 2 Indicator that the structure model may be wrong or deficient  
 3 ALERT type 3 Indicator that the structure quality may be low  
 4 ALERT type 4 Improvement, methodology, query or suggestion  
 1 ALERT type 5 Informative message, check

It is advisable to attempt to resolve as many as possible of the alerts in all categories. Often the minor alerts point to easily fixed oversights, errors and omissions in your CIF or refinement strategy, so attention to these fine details can be worthwhile. In order to resolve some of the more serious problems it may be necessary to carry out additional measurements or structure refinements. However, the purpose of your study may justify the reported deviations and the more serious of these should normally be commented upon in the discussion or experimental section of a paper or in the "special\_details" fields of the CIF. checkCIF was carefully designed to identify outliers and unusual parameters, but every test has its limitations and alerts that are not important in a particular case may appear. Conversely, the absence of alerts does not guarantee there are no aspects of the results needing attention. It is up to the individual to critically assess their own results and, if necessary, seek expert advice.

### **Publication of your CIF in IUCr journals**

A basic structural check has been run on your CIF. These basic checks will be run on all CIFs submitted for publication in IUCr journals (*Acta Crystallographica*, *Journal of Applied Crystallography*, *Journal of Synchrotron Radiation*); however, if you intend to submit to *Acta Crystallographica Section C* or *E* or *IUCrData*, you should make sure that full publication checks are run on the final version of your CIF prior to submission.

### **Publication of your CIF in other journals**

Please refer to the *Notes for Authors* of the relevant journal for any special instructions relating to CIF submission.

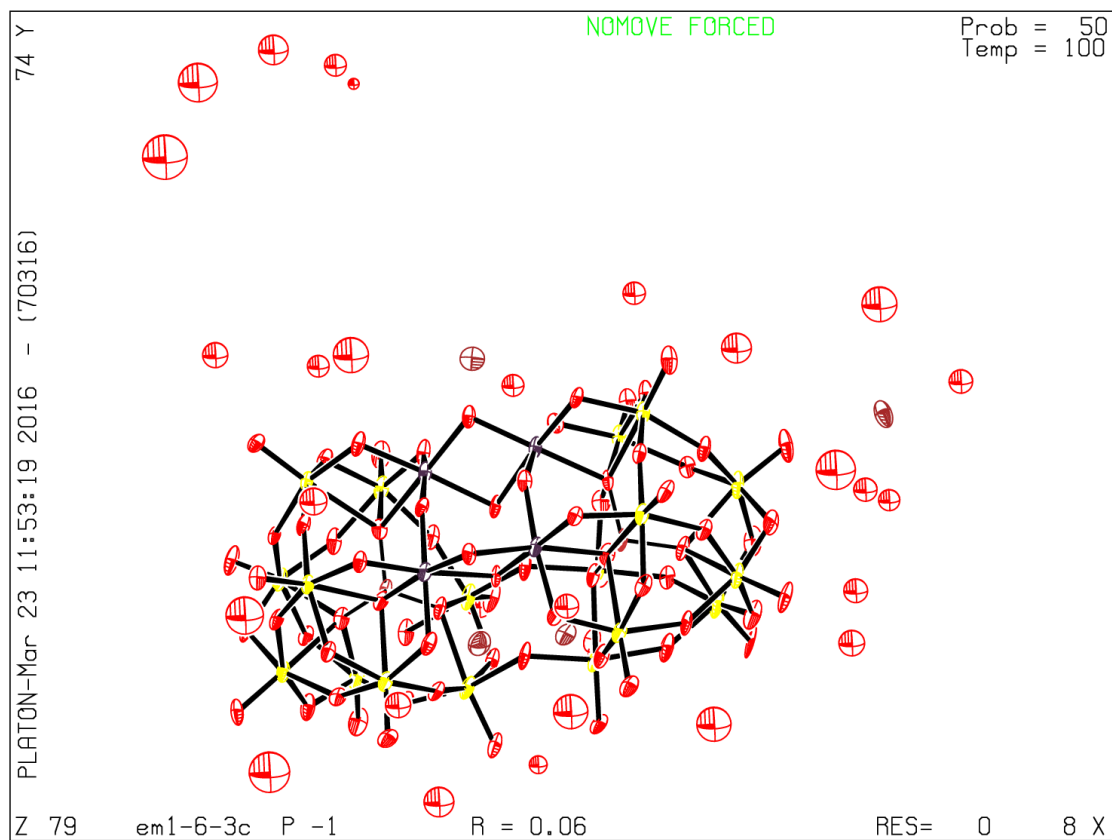

Supplement: s1 [file s1]
