# Supplementary material
Source: MDPI journal article supplement (https://www.mdpi.com/2304-6740/4/2/15)
Supplement: s1 [file s1]

# Supplementary Materials: $\beta,\beta$ -Isomer of Open-Wells-Dawson Polyoxometalate Containing Tetra-Iron(III) Hydroxide Cluster: $[\{\text{Fe}_4(\text{H}_2\text{O})(\text{OH})_5\}(\beta,\beta\text{-Si}_2\text{W}_{18}\text{O}_{66})]^{9-}$

Satoshi Matsunaga, Eriko Miyamae, Yusuke Inoue and Kenji Nomiya

**Table S1.** Bond valence sum (BVS) calculations of Fe and O atoms of the  $\{\text{Fe}_4(\text{H}_2\text{O})(\text{OH})_5\}$  cluster moieties of  $\beta,\beta\text{-Fe}_4\text{-open}$ .

|       |       |       |       |
|-------|-------|-------|-------|
| Fe(1) | 2.981 | O(67) | 1.106 |
| Fe(2) | 3.030 | O(68) | 0.796 |
| Fe(3) | 3.018 | O(69) | 1.157 |
| Fe(4) | 3.148 | O(70) | 0.660 |
|       |       | O(71) | 1.170 |
|       |       | O(72) | 1.255 |

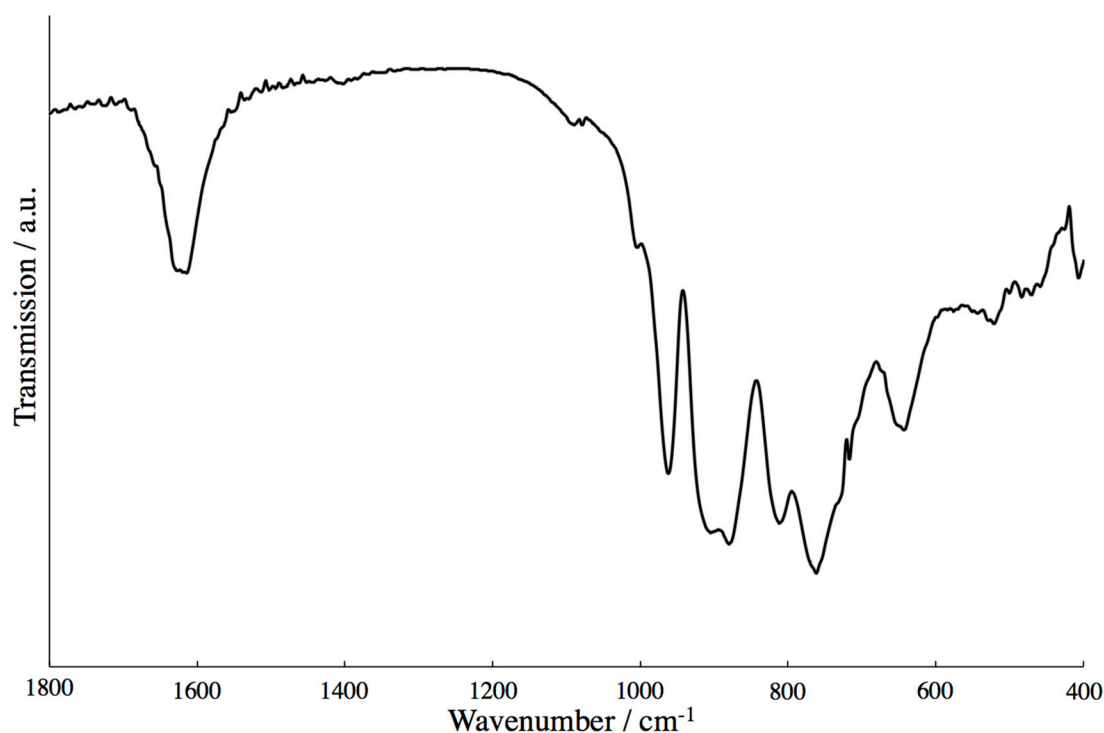

**Figure S1.** FT-IR spectrum of potassium salt of  $\beta,\beta\text{-Fe}_4\text{-open}$  (KBr disk).

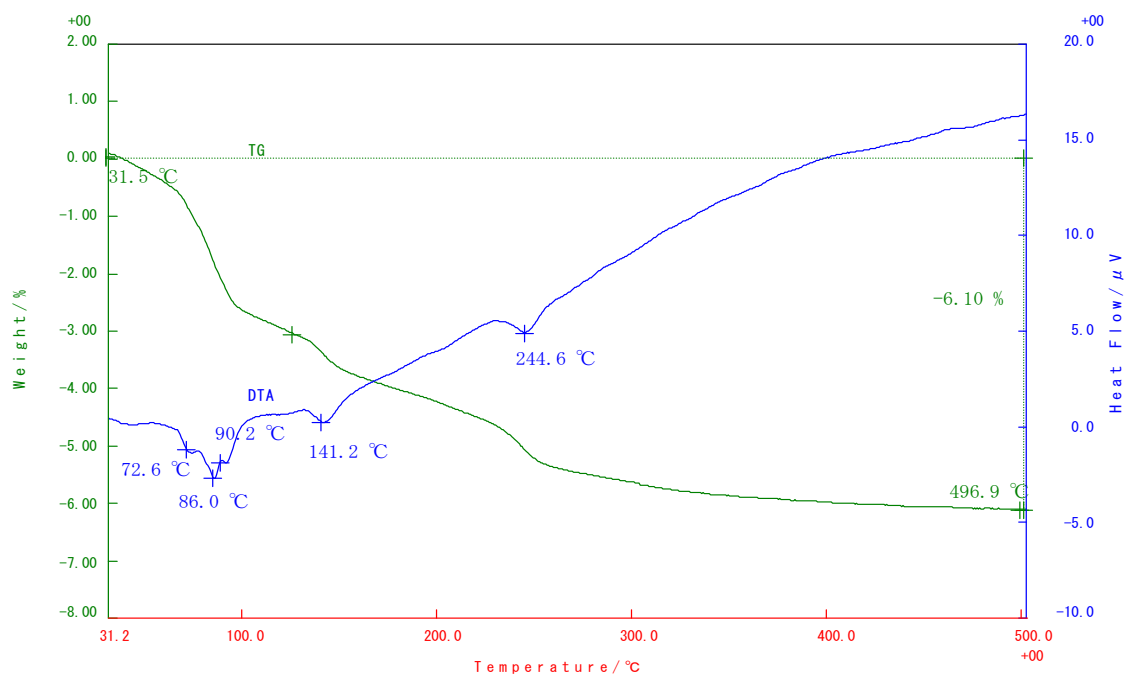

Figure S2. TG/DTA data of potassium salt of  $\beta,\beta\text{-Fe}_4\text{-open}$ .

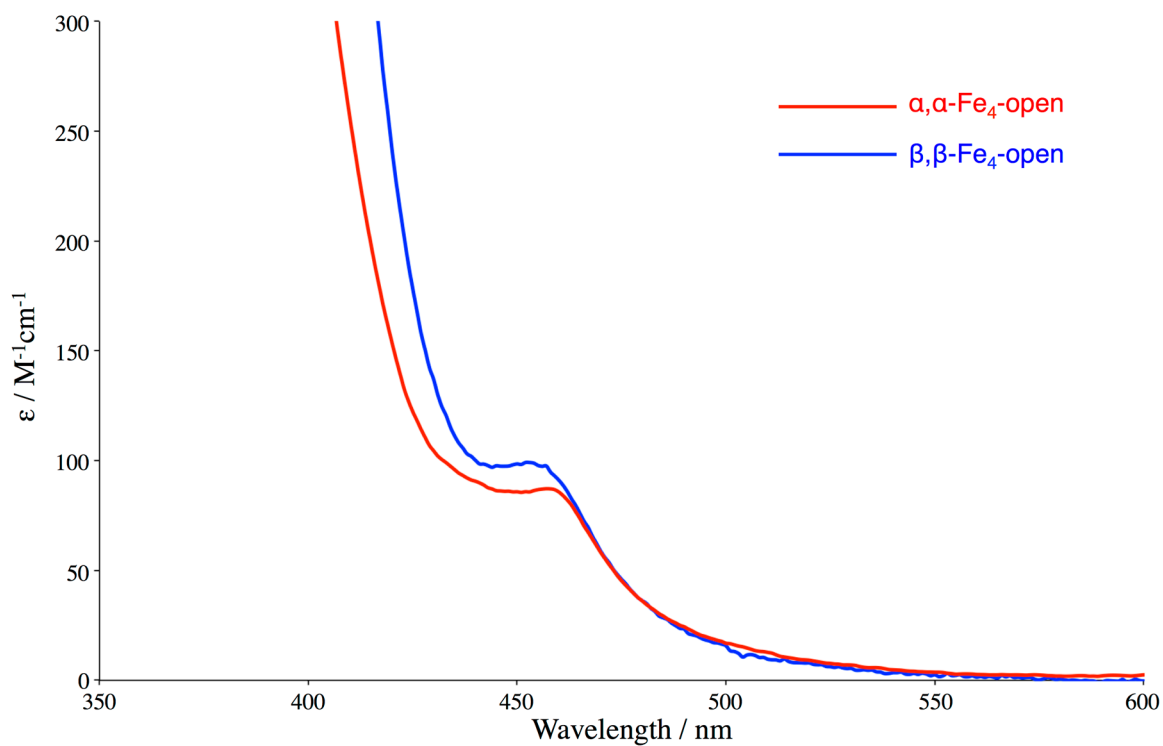

Figure S3. UV/VIS absorption spectra of potassium salt of  $\alpha,\alpha\text{-Fe}_4\text{-open}$  (red line) and  $\beta,\beta\text{-Fe}_4\text{-open}$  (blue line) in  $\text{H}_2\text{O}$ .

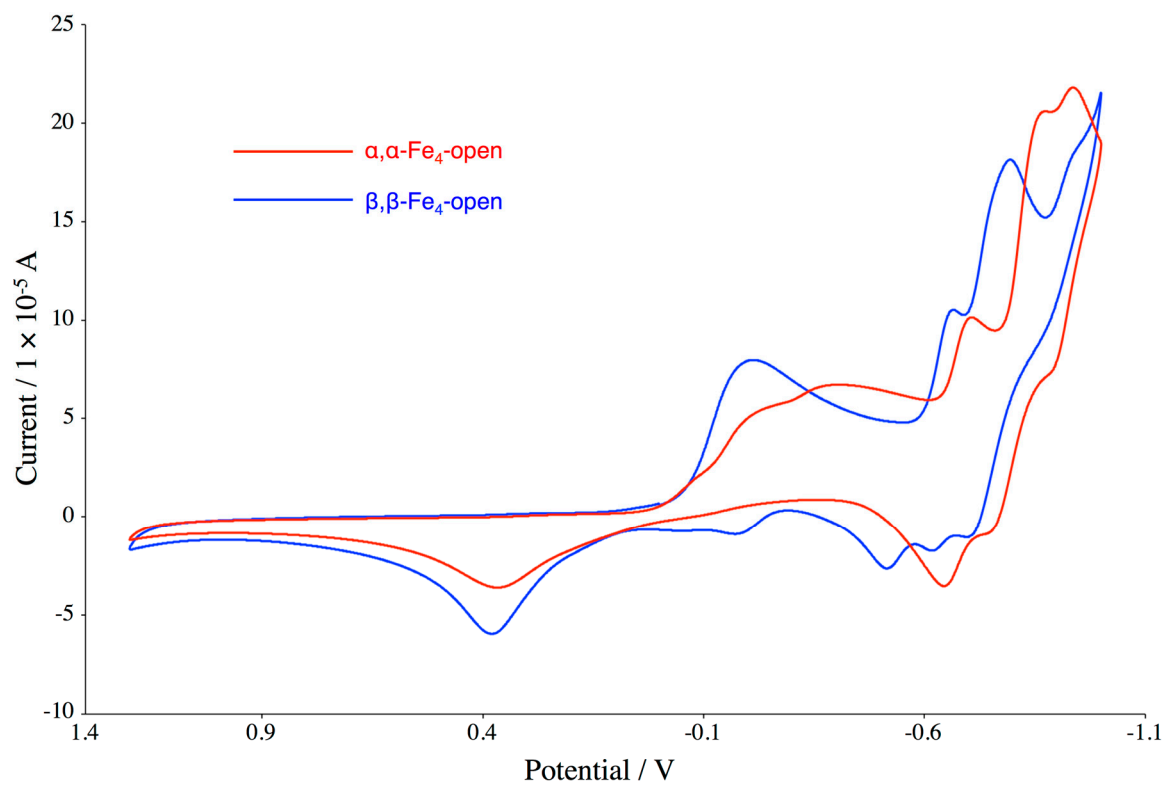

**Figure S4.** Cyclic voltammograms (CV) of 0.5 mM potassium salt of  $\alpha,\alpha$ - (red line) and  $\beta,\beta$ -Fe<sub>4</sub>-open (blue line) in 0.5 M potassium acetate buffer, pH 4.8, scan rate 25 mV·s<sup>-1</sup>, under N<sub>2</sub>.
